free of pressure-induced artefacts.<sup>7</sup> After calibration, the apparatus stays stable and can be used continuously for at least six months.

#### REFERENCES

1. Grenvik A, Hedstrand H: Problems in pneumotachography. *Acta Anaesth Scand* 10: 147, 1966
2. Hobbes AF: A comparison of calibrating the pneumotachograph. *Brit J Anaesth* 39:899, 1967
3. Noe FE: Computer analysis of curves from an infra-red CO<sub>2</sub> analyzer and screen type air-flow meter. *J Appl Physiol* 18:149, 1963
4. Hribar M, Milave Z, Jeretin S: Reports to the Fund "Boris Kidric." No. 402-A-560/2-E-107 NIJS, Ljubana, Jugoslavia, 1965
5. Hribar M, Milave Z, Jeretin S: Report to the Fund "Boris Kidric." No. 402-A-560/2-66, NIJS, Ljubana, Jugoslavia, 1966
6. Hribar M: An improvement of the continuous ionization method for linearity at low gas velocities. *Int J Appl Radiat* 18:631-638, 1967
7. Clayton CC, Webb JW: The measurement of mass flow and linear velocity of a gas by continuous ionization. *Int J Appl Radiat* 15:603-610, 1964
8. Herzog P, Norlander OP: A precision method for the dynamic volume-flow calibration during pneumotachography. *Acta Anaesth Scand suppl* XXIV:119-126, 1966
9. Bennett Cascade Humidifier Operating Instructions, vol. 1. Bennett Respiration Products, Inc., Santa Monica, California, 1967
10. Loeb LB: Basic Process of Gaseous Electronics. Berkeley, California, University Press, 1961
11. Fleisch A: Der Pneumotachograph: Die apparatur zur geschwindigkeitsregistrierung der atemluft. *Flueger Arch Ges Physiol* 209:713-722, 1935

## Intravenous Regional Anesthesia for Sequential Operations on Two Extremities

ELI M. BROWN, M.D., BARRY G. SMILER, M.D.,  
MILFORD E. WENOKUR, M.D.

Most anesthesiologists limit the use of intravenous regional anesthesia to short procedures on the forearm and hand. Our experience, however, encouraged us to extend the applications of this technique, and one of us (E. M. B.) has described its use for prolonged procedures.<sup>1,2</sup> The purpose of this communication is to present our experience with intravenous regional anesthesia in operations involving two extremities, both upper and lower.

#### TECHNIQUE

For the upper extremities, the method is essentially that described by Holmes,<sup>3</sup> using lidocaine, 0.5 per cent. When the operation on the first extremity is nearing completion,

anesthesia is induced in the second extremity. After anesthesia in the second extremity has been established, the tourniquet on the first extremity is released, provided that at least 40 minutes have elapsed from the time of initial injection of drug.

Originally, we used the same technique for procedures on the lower extremity, but we found this not completely satisfactory, since patients frequently experienced tourniquet pain despite the use of a double tourniquet. Consequently, we have modified our technique for procedures on the lower extremity. Regardless of the site of operation, the tourniquet is placed at midthigh. Instead of 40-50 ml of 0.5 per cent lidocaine, we use 75-100 ml of 0.35 per cent lidocaine. This concentration is prepared by adding 30 ml of saline solution to 70 ml of 0.5 per cent lidocaine to make 100 ml of 0.35 per cent lidocaine.

Received from the Department of Anesthesiology, Sinai Hospital of Detroit, Detroit, Michigan 48235.

TABLE 1. Patients and Procedures

|            | Age, Sex | Operation                                                                                                                                        | Dose             | Time                                    | Remarks                                                                                |
|------------|----------|--------------------------------------------------------------------------------------------------------------------------------------------------|------------------|-----------------------------------------|----------------------------------------------------------------------------------------|
| Patient 1  | 71, F    | Excision bilateral plantar neuromata                                                                                                             | 225 mg<br>250 mg | Left 42 min<br>Right 42 min             |                                                                                        |
| Patient 2  | 57, F    | Excision cyst right foot<br>Excision ingrown toenail left foot                                                                                   | 250 mg<br>250 mg | Right 50 min<br>Left 54 min             | Severe arteriosclerotic heart disease                                                  |
| Patient 3  | 50, F    | Bilateral Keller arthroplasties                                                                                                                  | 250 mg<br>250 mg | Left 49 min<br>Right 46 min             |                                                                                        |
| Patient 4  | 61, F    | Bilateral bunionectomy                                                                                                                           | 250 mg<br>250 mg | Right 1 hour, 7 min<br>Left 52 min      |                                                                                        |
| Patient 5  | 21, M    | Tendon transplant from left foot to right hand                                                                                                   | 350 mg<br>200 mg | Leg 1 hour, 4 min<br>Arm 1 hour, 46 min |                                                                                        |
| Patient 6  | 57, F    | Excision tendon sheath left thumb<br>Keller arthroplasty left foot                                                                               | 200 mg<br>280 mg | Arm 55 min<br>Leg 50 min                |                                                                                        |
| Patient 7  | 58, M    | Excision rheumatoid nodules, both forearms,<br>arthrodesis right wrist                                                                           | 200 mg<br>450 mg | Left 50 min<br>Right 2 hours, 31 min    | Continuous; cuff deflated after 1 hour, 23 min. Re-inflated for additional hour, 8 min |
| Patient 8  | 26, M    | Excision Dupuytren's contracture; bilateral                                                                                                      | 250 mg<br>250 mg | Left 48 min<br>Right 51 min             |                                                                                        |
| Patient 9  | 46, F    | Bilateral median nerve decompression                                                                                                             | 250 mg<br>250 mg | Left 45 min<br>Right 50 min             |                                                                                        |
| Patient 10 | 73, M    | Bilateral median nerve decompression                                                                                                             | 250 mg<br>250 mg | Left 32 min<br>Right 34 min             |                                                                                        |
| Patient 11 | 46, F    | Synovectomy left thumb<br>Synovectomy P.I.P. joint right ring finger                                                                             | 200 mg<br>200 mg | Left 50 min<br>Right 1 hour, 5 min      |                                                                                        |
| Patient 12 | 56, F    | Arthroplasty with bone resection of right foot, syn-<br>dactomy and proximal phalangectomy of left<br>foot, proximal phalangectomy of right foot | 350 mg<br>350 mg | Right 50 min<br>Left 40 min             |                                                                                        |

## CASE MATERIAL

Twelve patients have received intravenous regional anesthesia for surgical operations on two extremities (table 1). Blood levels of lidocaine were determined in three patients by gas chromatography. Blood samples were drawn from one of the uninvolved extremities.

## RESULTS

Anesthesia was judged successful in all of the cases described here. There was no evidence of local anesthetic toxicity. There were no postanesthetic complications. Lidocaine blood levels are shown in table 2.

TABLE 2. Plasma Levels of Lidocaine ( $\mu\text{g/ml}$ )

|            | Dosage | Extremity  | Release | Release<br>+ 5 Min | Release<br>+ 15 Min |
|------------|--------|------------|---------|--------------------|---------------------|
| Patient 5  | 350 mg | Left foot  | 2.8     | 3.2                | 2.6                 |
|            | 200 mg | Right hand | 1.6     | 2.0                | 1.6                 |
| Patient 6  | 200 mg | Left hand  | 0.9     | 1.6                | 1.4                 |
|            | 280 mg | Left foot  | 2.2     | 2.8                | 2.8                 |
| Patient 12 | 350 mg | Right foot | 2.5     | 4.3                | 3.0                 |
|            | 350 mg | Left foot  | 2.0     | 4.0                | 3.1                 |

## COMMENT

The applicability of intravenous regional anesthesia to surgery involving two extremities increases the scope of this procedure and does not appear to increase the risk of local anesthetic toxicity. Although some of the blood levels of lidocaine are somewhat higher than those reported by Mazze *et al.*<sup>4</sup> for operations on single extremities, the values are well below the levels at which toxicity should occur.<sup>5</sup> It should be noted, however, that we have not used this technique for simultaneous operations on two extremities by two teams of surgeons; therefore, we cannot comment on the safety of that procedure.

We have found that this technique, as reported here, can be used for relatively poor-risk patients and outpatients. The only specific contraindications to its use are allergy or hypersensitivity to local anesthetics and conditions that preclude the use of a tourniquet. The method is as safe and reliable for operations on the lower extremity as for those on the upper extremity when 75–100 ml of 0.35 per cent lidocaine are used, even in operations involving two extremities.

## SUMMARY

We have described the use of intravenous regional anesthesia for operations on two extremities performed in a single session in the operating room. This method of anesthesia was highly reliable for surgery on lower as well as upper extremities. Use of intravenous regional anesthesia for two extremities does not appear to increase the risk to the patient.

## REFERENCES

1. Brown EM, Weissman F: Prolonged intravenous regional anesthesia. *Anesth Analg Curr Res* 45:319–321, 1966
2. Brown EM: Continuous intravenous regional anesthesia. *Acta Anaesth Scand suppl XXXVI*, 39–45, 1969
3. Holmes C McK: Intravenous regional anesthesia: A useful method of producing analgesia of the limbs. *Lancet* 1:245, 1963
4. Mazze RI, Dunbar RW: Plasma lidocaine concentrations after caudal, lumbar, epidural, axillary block and intravenous regional anesthesia. *ANESTHESIOLOGY* 27:574–579, 1966
5. Foldes FF, Malloy R, McNall PG, *et al.*: Comparison of toxicity of intravenously given local anesthetic agents in man. *JAMA* 172:1493–1498, 1960
